# Supplementary material for: Color brightness modulation of a responsive photonic liquid for multicolored electrochromic displays
Source: Royal Society of Chemistry journal article supplement (doi:10.1039/d1tc05516j), 2022-01-01
Supplement: d1tc05516j1.pdf [file d1tc05516j1.pdf]

## Supporting Information

### **Color brightness modulation of responsive photonic liquid for multicolored electrochromic displays**

*Shaoxin Song<sup>a,§</sup>, Yang Liu<sup>b,§</sup>, Xuejuan Liu<sup>a</sup>, Jianping Ge<sup>c</sup>, Dengteng Ge<sup>b</sup>, Lili Yang<sup>a,\*</sup>*

This PDF includes:

Figure S1 to S5

Table S1

Legends for Video S1 and Video S2

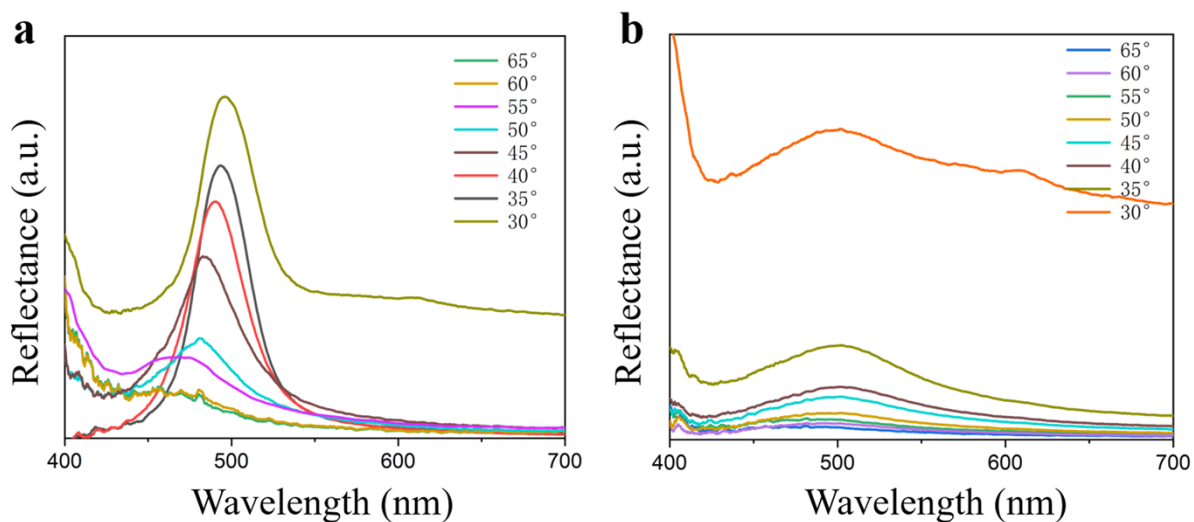

**Figure S1.** Reflection spectra of SCD with treated (a) and untreated ITO (b) electrodes at various viewing angles.

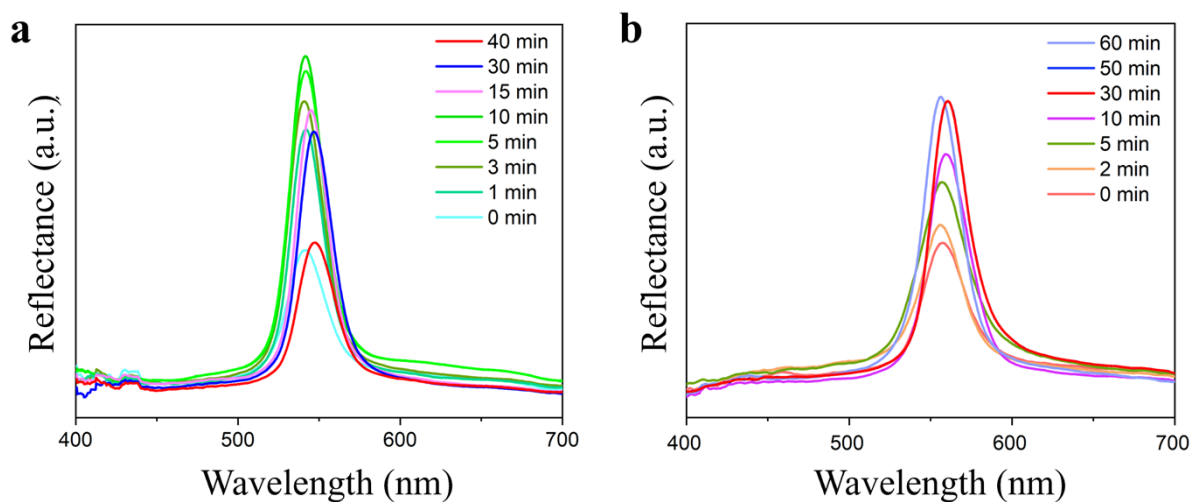

**Figure S2.** (a) Reflectance spectra of SCD with various time of O<sub>2</sub> plasma treatment.  
 (b) Reflectance spectra of SCD with various time of PDDA soaking treatment.

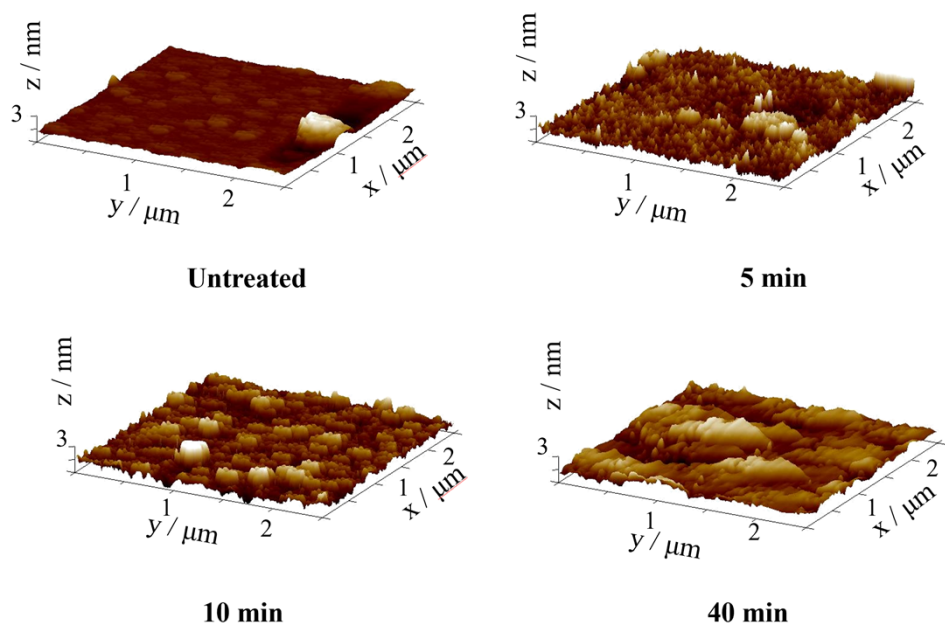

**Figure S3.** AFM topographic images ITO electrode treated for different time.

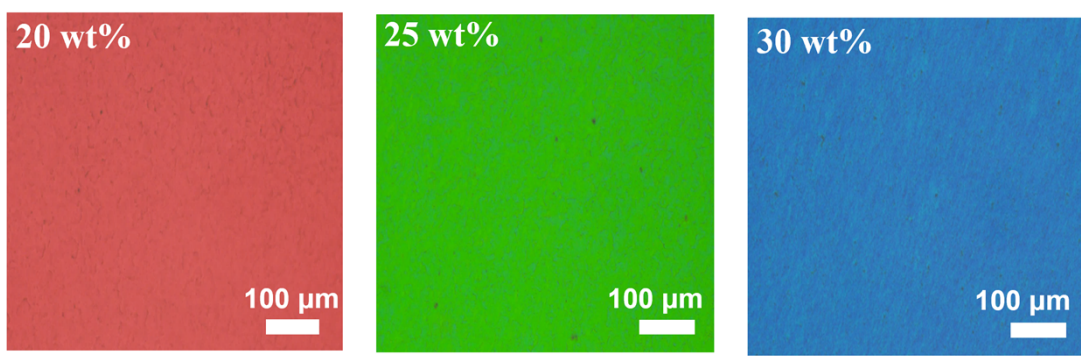

**Figure S4.** Optical microscopic images of SCD with various NPs concentration.

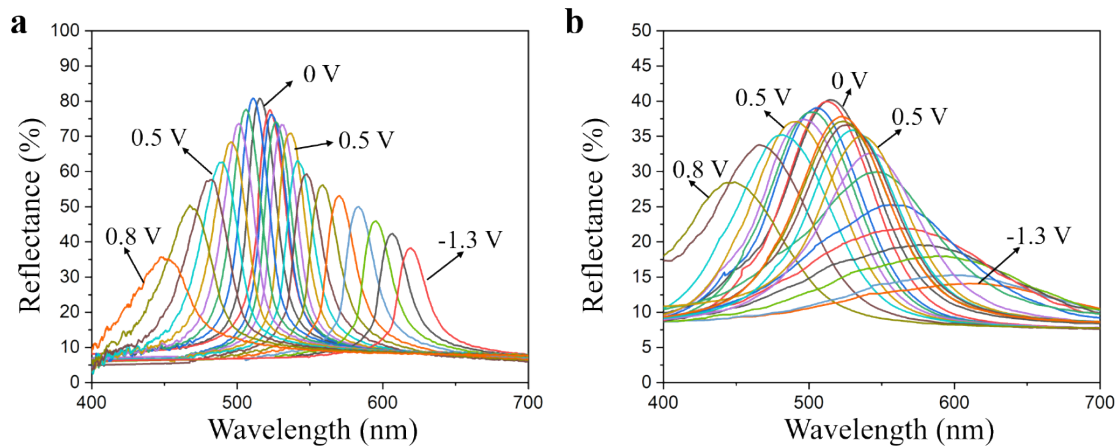

**Figure S5.** Reflection spectra of SCD with treated (a) and untreated ITO (b) electrodes at different voltages.

**Table S1.** Reflectance and FWHM of SCD with various mass fraction liquid colloidal crystal and untreated/treated ITO glass

|       | Blue (30 wt%) |         | Green (25 wt%) |         | Red (20 wt%) |         |
|-------|---------------|---------|----------------|---------|--------------|---------|
|       | Untreated     | Treated | Untreated      | Treated | Untreated    | Treated |
| R (%) | 30.8          | 66.4    | 37.8           | 80.8    | 46.8         | 96.2    |
| FWHM  | 70.6          | 28.1    | 58.7           | 33.6    | 61.3         | 38.6    |

Legends for the supplementary videos

Video S1 Dynamic modulation of patterned SCD with enhanced brightness

Video S2 Smart optical display with local independent control
